# Supplementary material for: Terminal NK cell maturation is controlled by concerted actions of T-bet and Zeb2 and is essential for melanoma rejection
Source: PubMed Central journal article supplement — J Exp Med. 2015 Nov 16;212(12):2015–25. doi: 10.1084/jem.20150809 (PMC4647267; doi:10.1084/jem.20150809), 2015-11-16
Supplement: supp_jem.20150809_JEM_20150809_sm.pdf [file supp_jem.20150809_JEM_20150809_sm.pdf]

SUPPLEMENTAL MATERIAL

van Helden et al., <http://www.jem.org/cgi/content/full/jem.20150809/DC1>

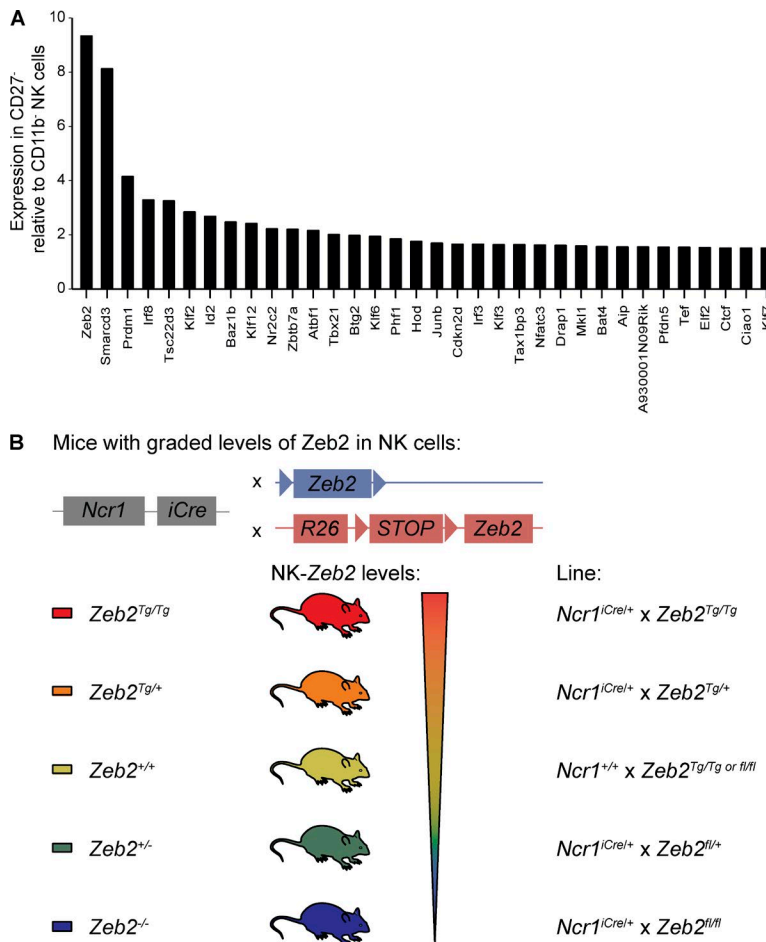

Figure S1. TFs with higher expression in mature versus immature NK cells. (A) TFs with a higher mRNA expression level in mature compared with immature NK cells. The expression ratio of mRNA encoding for different TFs between CD11b<sup>-</sup> and CD27<sup>-</sup> NK cells, as previously measured using microarrays (Chiossone et al., 2009), is shown. (B) An overview of the mice lines with graded levels of Zeb2 in NKp46<sup>+</sup> cells that are used in this study and their corresponding legends.

REFERENCE

Chiossone, L., J. Chaix, N. Fuseri, C. Roth, E. Vivier, and T. Walzer. 2009. Maturation of mouse NK cells is a 4-stage developmental program. *Blood*. 113:5488–5496. <http://dx.doi.org/10.1182/blood-2008-10-18717919234143>
